# Supplementary material for: Synthesis and the Crystal Structure of a New Chiral 1D Metal–Organic Coordination Polymer Based on L-Prolineamide-Substituted Diarylacetylenedicarboxylic Acid Derivative
Source: MDPI journal article supplement (doi:10.3390/molecules27238376), 2022-11-30
Supplement: s1 [file s1]

## Supporting Information

### Synthesis and the Crystal Structure of a New Chiral 1D Metal-Organic Coordination Polymer based on L-Prolineamide-Substituted Diarylacetylenedicarboxylic Acid Derivative

Vladimir V. Veselovsky <sup>1</sup>, Vera I. Isaeva <sup>1</sup>, V. D. Nissenbaum <sup>1</sup>, Leonid M. Kustov <sup>1,2</sup> and Vladimir V. Chernyshev <sup>3,4,\*</sup>

<sup>1</sup> N.D. Zelinsky Institute of Organic Chemistry, Russian Academy of Sciences, Leninsky prospect 47, Moscow 119991, Russia

<sup>2</sup> National University of Science and Technology MISiS, Leninsky prospect 4, Moscow 119991, Russia

<sup>3</sup> Department of Chemistry, M.V. Lomonosov Moscow State University, 1-3 Leninskie Gory, Moscow 119991, Russia;

<sup>4</sup> A.N. Frumkin Institute of Physical Chemistry and Electrochemistry, Russian Academy of Sciences, Building 4, 31 Leninsky prospect, Moscow 119071, Russia

\* Correspondence: vladimir@struct.chem.msu.ru (VVC)

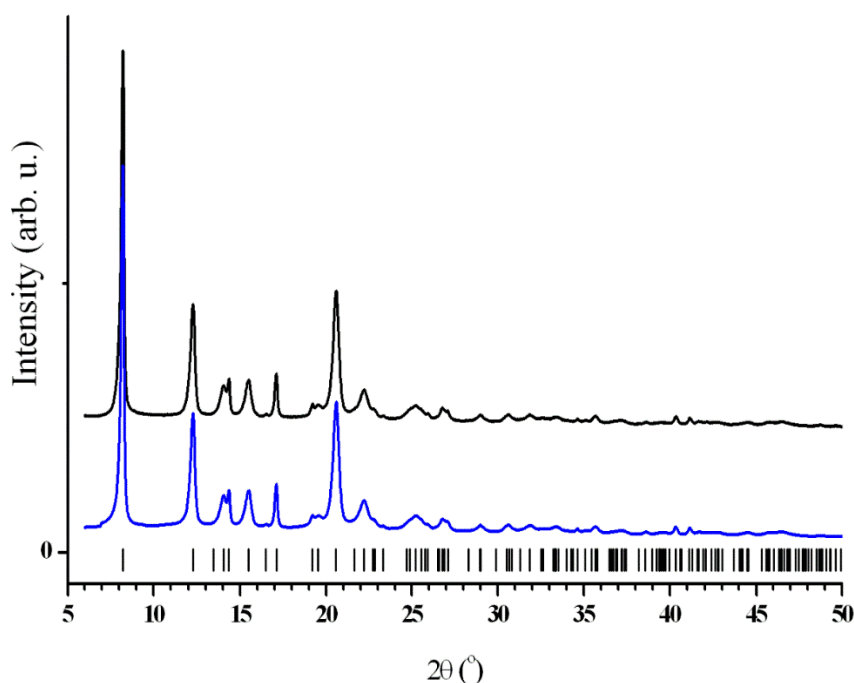

**Figure S1.** Comparison of experimental (top, in black) and calculated (bottom, in blue) powder patterns for  $[\text{Cu}_2(\text{EDPB})\cdot\text{H}_2\text{O}]_n$  in 6-50°  $2\theta$  range. The vertical black bars denote calculated positions of the diffraction peaks.

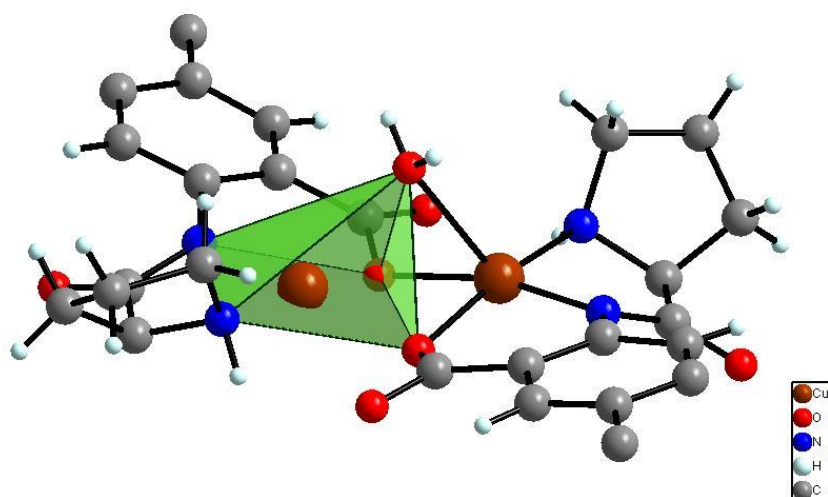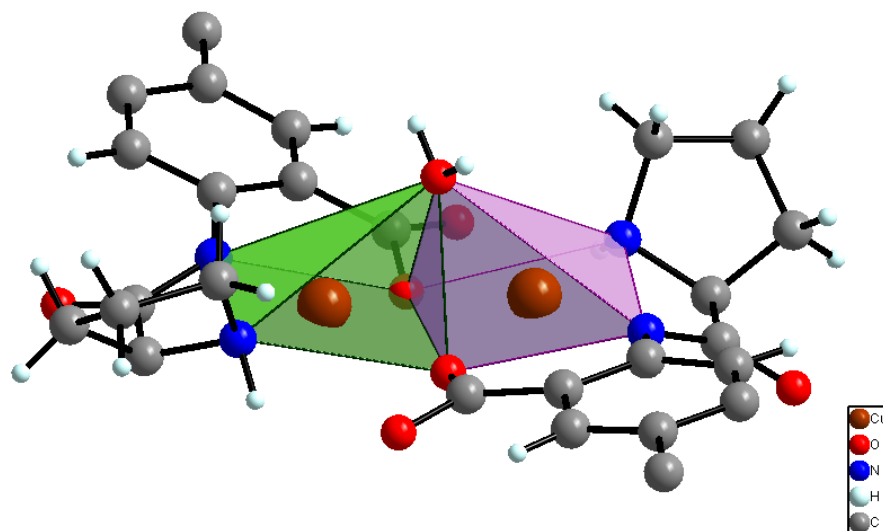

**Figure S2** (prepared with DIAMOND <sup>1</sup>). A portion of the crystal structure of  $[\text{Cu}_2(\text{EDPB})\cdot\text{H}_2\text{O}]_n$  showing the heavily distorted square-base coordination pyramid (top), and two Cu-centered coordination polyhedra merged by sharing of a triangular face (bottom).

(1) Brandenburg, K. (1999). *DIAMOND*. Crystal Impact GbR, Bonn, Germany.

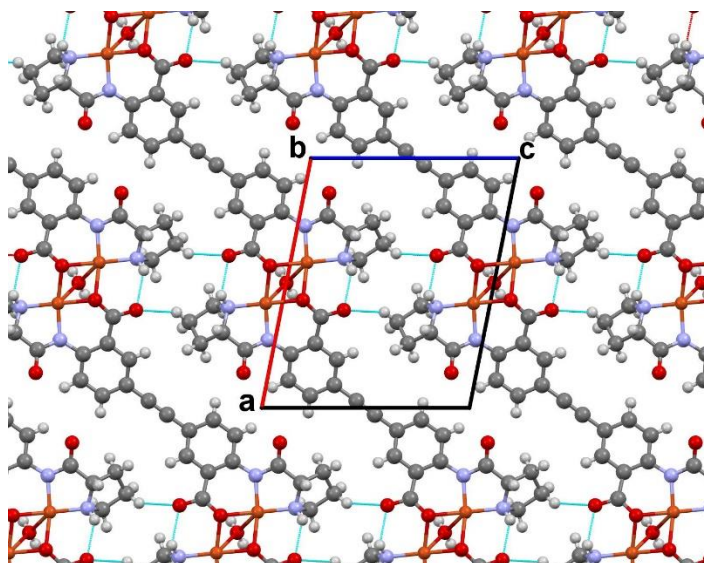

**Figure S3.** 2D layer in  $[\text{Cu}_2(\text{EDPB})\cdot\text{H}_2\text{O}]_n$  formed by  $\text{N2-H2}\dots\text{O2}^{\text{i}}$  and  $\text{C11-H11A}\dots\text{O2}^{\text{iii}}$  hydrogen bonds (see Table 2) viewed along the  $b$  axis. Hydrogen bonds are shown as thin blue lines.

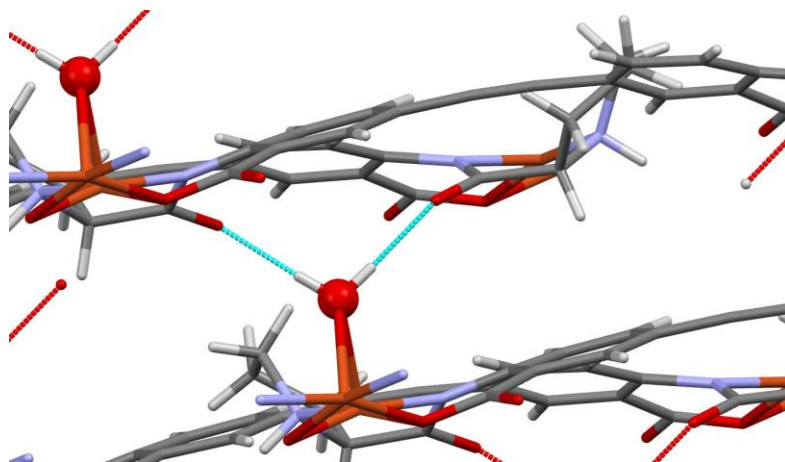

**Figure S4.** A portion of the crystal packing in  $[\text{Cu}_2(\text{EDPB})\cdot\text{H}_2\text{O}]_n$  showing intermolecular  $\text{O4-H4}\dots\text{O3}^{\text{ii}}$  (see Table 2) hydrogen bonds (thin blue and red lines), which link 1D polymeric chains from various 2D layers and consolidate the 3D structure.

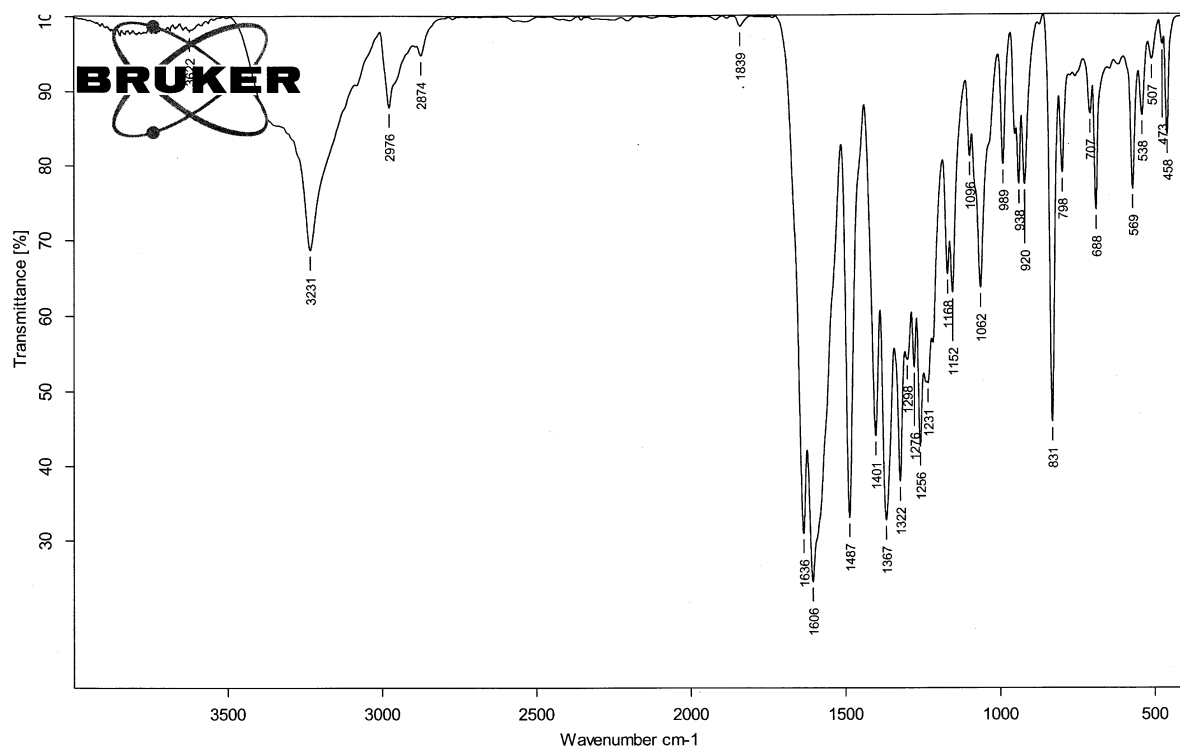

Figure S5. IR spectrum of the  $[\text{Cu}_2(\text{EDPB})\cdot\text{H}_2\text{O}]_n$  polymer.

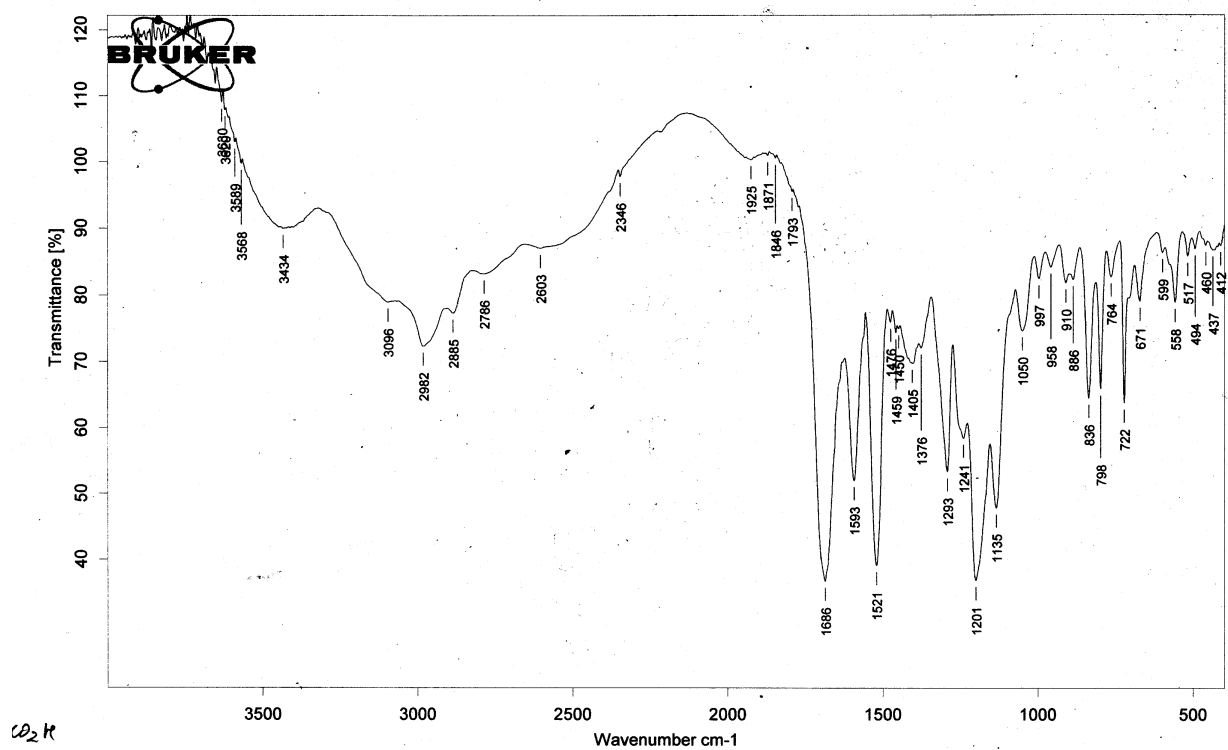

Figure S6. IR spectrum of the EDPBA linker.

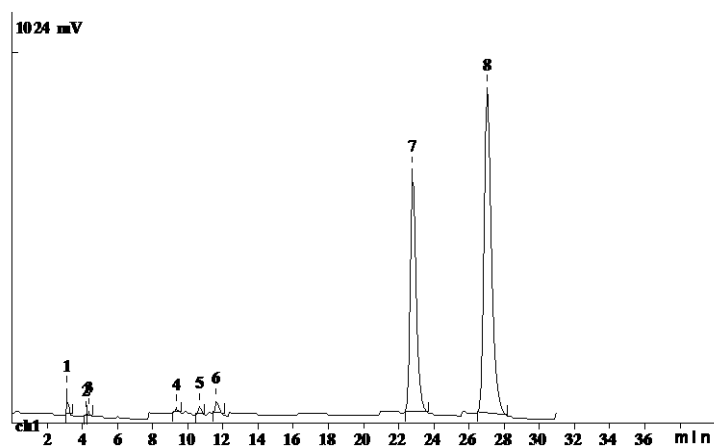

| index | Time<br>(min) | Area<br>(mV/sec) | Area<br>(%) |
|-------|---------------|------------------|-------------|
| 5     | 10.69         | 251.80           | 0.58        |
| 6     | 11.67         | 532.44           | 1.22        |
| 7     | 22.80         | 15612.13         | 35.92       |
| 8     | 27.03         | 26399.02         | 60.73       |
|       | 31.06         | ~43400           | ~100        |

**Figure S7.** HPLC analysis of the product of 4-nitrobenzaldehyde and nitromethane Henry reaction.
